# Supplementary material for: A novel epidemiological model to better understand and predict the observed seasonal spread of Pestivirus in Pyrenean chamois populations
Source: Springer Nature journal article supplement (doi:10.1186/s13567-015-0218-8), 2015-07-24
Supplement: MOESM2 [file 13567_2015_218_MOESM2_ESM.pdf]

## Additional file 2 - Conceptual model of pestivirus spread

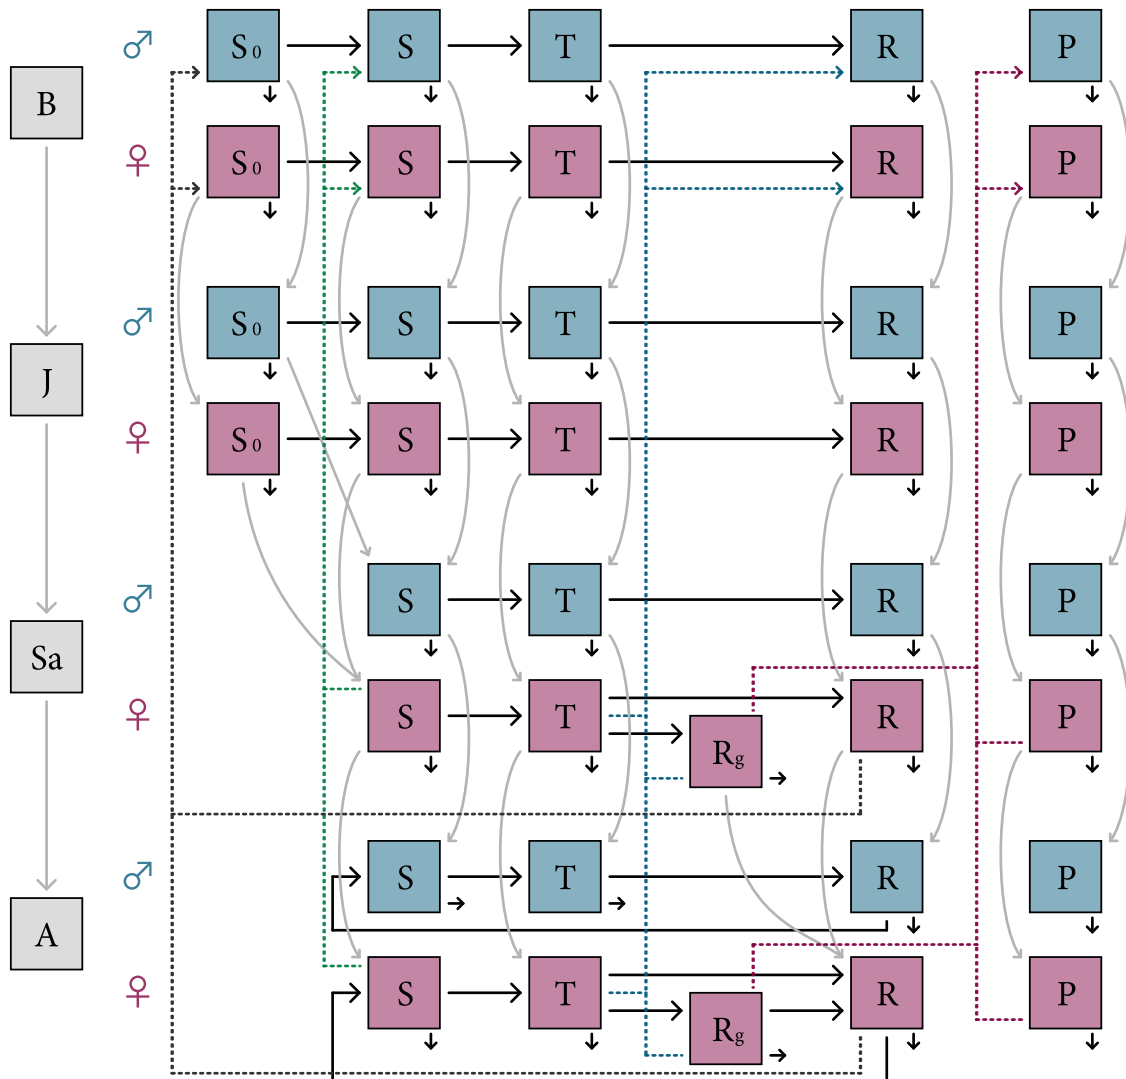

Conceptual model of pestivirus spread. Squares : health states, solid black arrows : transitions between health states, solid gray arrows : transitions between age classes, dashed arrows : reproduction (production of newborns),  $S_0$  : protected by maternal immunity,  $S$  : susceptible,  $T$  : transiently infected,  $R_g$  : resistant with a possibility of pregnancy with a risk of vertical transmission,  $R$  : resistant without a possibility of pregnancy with a risk of vertical transmission,  $P$  : persistently infected.
