# Supplementary material for: A novel epidemiological model to better understand and predict the observed seasonal spread of Pestivirus in Pyrenean chamois populations
Source: Springer Nature journal article supplement (doi:10.1186/s13567-015-0218-8), 2015-07-24
Supplement: MOESM3 [file 13567_2015_218_MOESM3_ESM.pdf]

### Additional file 3 - Associated equations of the model

The ODE system is given below. The notation  $\dot{x}$  denotes the derivative with respect to time such that  $\dot{x} = \frac{dx}{dt}$ . The proportion of females at birth is  $\delta$  and the proportion of males is  $(1 - \delta)$ . Functions of horizontal transmission ( $f_i$ ) are defined in the following equations. The meaning of the parameters is given in Tables 1 and 2 of the article.

#### Newborn $\varphi$

$$(1a) \quad S_{B\varphi}^{\dot{0}} = -(\mu_{Juv}(t) + \alpha) \cdot S_{B\varphi}^0 + \delta \cdot (\eta_{Sa}(t) \cdot R_{Sa\varphi} + \eta_A \cdot R_{A\varphi})$$

$$(1b) \quad S_{B\varphi}^{\dot{1}} = -(\mu_{Juv}(t) + f_1) \cdot S_{B\varphi} + \alpha \cdot S_{B\varphi}^0 + \delta \cdot (\eta_{Sa}(t) \cdot S_{Sa\varphi} + \eta_A \cdot S_{A\varphi})$$

$$(1c) \quad T_{B\varphi}^{\dot{1}} = -(\mu_{Juv}(t) + \mu^T + \gamma) \cdot T_{B\varphi} + f_1 \cdot S_{B\varphi}$$

$$(1d) \quad R_{B\varphi}^{\dot{1}} = -\mu_{Juv}(t) \cdot R_{B\varphi} + \gamma \cdot T_{B\varphi} + \delta \cdot (\eta_{Sa}(t) \cdot T_{Sa\varphi} + \eta_A \cdot T_{A\varphi} + \eta_{Sa}(t) \cdot (1 - p_{Sa\varphi}) \cdot R_{Sa\varphi}^g + \eta_A \cdot (1 - p_{A\varphi}) \cdot R_{A\varphi}^g)$$

$$(1e) \quad P_{B\varphi}^{\dot{1}} = -(\mu_{Juv}(t) + \mu^P) \cdot P_{B\varphi} + \delta \cdot (1 - \rho) \cdot (\eta_{SaP}(t) \cdot P_{Sa\varphi} + \eta_{AP} \cdot P_{A\varphi} + \eta_{Sa}(t) \cdot p_{Sa\varphi} \cdot R_{Sa\varphi}^g + \eta_A \cdot p_{A\varphi} \cdot R_{A\varphi}^g)$$

#### Newborn $\sigma$

$$(2a) \quad S_{B\sigma}^{\dot{0}} = -(\mu_{Juv}(t) + \alpha) \cdot S_{B\sigma}^0 + (1 - \delta) \cdot (\eta_{Sa}(t) \cdot R_{Sa\sigma} + \eta_A \cdot R_{A\sigma})$$

$$(2b) \quad S_{B\sigma}^{\dot{1}} = -(\mu_{Juv}(t) + f_1) \cdot S_{B\sigma} + \alpha \cdot S_{B\sigma}^0 + (1 - \delta) \cdot (\eta_{Sa}(t) \cdot S_{Sa\sigma} + \eta_A \cdot S_{A\sigma})$$

$$(2c) \quad T_{B\sigma}^{\dot{1}} = -(\mu_{Juv}(t) + \mu^T + \gamma) \cdot T_{B\sigma} + f_1 \cdot S_{B\sigma}$$

$$(2d) \quad R_{B\sigma}^{\dot{1}} = -\mu_{Juv}(t) \cdot R_{B\sigma} + \gamma \cdot T_{B\sigma} + (1 - \delta) \cdot (\eta_{Sa}(t) \cdot T_{Sa\sigma} + \eta_A \cdot T_{A\sigma} + \eta_{Sa}(t) \cdot (1 - p_{Sa\sigma}) \cdot R_{Sa\sigma}^g + \eta_A \cdot (1 - p_{A\sigma}) \cdot R_{A\sigma}^g)$$

$$(2e) \quad P_{B\sigma}^{\dot{1}} = -(\mu_{Juv}(t) + \mu^P) \cdot P_{B\sigma} + (1 - \delta) \cdot (1 - \rho) \cdot (\eta_{SaP}(t) \cdot P_{Sa\sigma} + \eta_{AP} \cdot P_{A\sigma} + \eta_{Sa}(t) \cdot p_{Sa\sigma} \cdot R_{Sa\sigma}^g + \eta_A \cdot p_{A\sigma} \cdot R_{A\sigma}^g)$$

#### Young $\varphi$

$$(3a) \quad S_{Y\varphi}^{\dot{0}} = -(\mu_{Juv}(t) + \alpha) \cdot S_{Y\varphi}^0$$

$$(3b) \quad S_{Y\varphi}^{\dot{1}} = -(\mu_{Juv}(t) + f_1) \cdot S_{Y\varphi} + \alpha \cdot S_{Y\varphi}^0$$

$$(3c) \quad T_{Y\varphi}^{\dot{1}} = -(\mu_{Juv}(t) + \mu^T + \gamma) \cdot T_{Y\varphi} + f_1 \cdot S_{Y\varphi}$$

$$(3d) \quad R_{Y\varphi}^{\dot{1}} = -\mu_{Juv}(t) \cdot R_{Y\varphi} + \gamma \cdot T_{Y\varphi}$$

$$(3e) \quad P_{Y\varphi}^{\dot{1}} = -(\mu_{Juv}(t) + \mu^P) \cdot P_{Y\varphi}$$

#### Young $\sigma$

$$(4a) \quad S_{Y\sigma}^{\dot{0}} = -(\mu_{Juv}(t) + \alpha) \cdot S_{Y\sigma}^0$$

$$(4b) \quad S_{Y\sigma}^{\dot{1}} = -(\mu_{Juv}(t) + f_1) \cdot S_{Y\sigma} + \alpha \cdot S_{Y\sigma}^0$$

$$(4c) \quad T_{Y\sigma}^{\dot{1}} = -(\mu_{Juv}(t) + \mu^T + \gamma) \cdot T_{Y\sigma} + f_1 \cdot S_{Y\sigma}$$

$$(4d) \quad R_{Y\sigma}^{\dot{1}} = -\mu_{Juv}(t) \cdot R_{Y\sigma} + \gamma \cdot T_{Y\sigma}$$

$$(4e) \quad P_{Y\sigma}^{\dot{1}} = -(\mu_{Juv}(t) + \mu^P) \cdot P_{Y\sigma}$$

**Sub-adult  $\varphi$** 

$$\begin{aligned}
(5a) \quad S_{S\alpha\varphi}^{\dot{}} &= -(\mu_{S\alpha\varphi} + f_1) \cdot S_{S\alpha\varphi} \\
(5b) \quad T_{S\alpha\varphi}^{\dot{}} &= -(\mu_{S\alpha\varphi} + \mu^T + \gamma) \cdot T_{S\alpha\varphi} + f_1 \cdot S_{S\alpha\varphi} \\
(5c) \quad R_{S\alpha\varphi}^{\dot{}} &= -\mu_{S\alpha\varphi} \cdot R_{S\alpha\varphi}^g + \nu(t) \cdot \gamma \cdot T_{S\alpha\varphi} \\
(5d) \quad R_{S\alpha\varphi}^{\dot{}} &= -\mu_{S\alpha\varphi} \cdot R_{S\alpha\varphi} + (1 - \nu(t)) \cdot \gamma \cdot T_{S\alpha\varphi} \\
(5e) \quad P_{S\alpha\varphi}^{\dot{}} &= -(\mu_{S\alpha\varphi} + \mu^P) \cdot P_{S\alpha\varphi}
\end{aligned}$$

**Sub-adult  $\sigma$** 

$$\begin{aligned}
(6a) \quad S_{S\alpha\sigma}^{\dot{}} &= -(\mu_{S\alpha\sigma} + f_2) \cdot S_{S\alpha\sigma} \\
(6b) \quad T_{S\alpha\sigma}^{\dot{}} &= -(\mu_{S\alpha\sigma} + \mu^T + \gamma) \cdot T_{S\alpha\sigma} + f_2 \cdot S_{S\alpha\sigma} \\
(6c) \quad R_{S\alpha\sigma}^{\dot{}} &= -\mu_{S\alpha\sigma} \cdot R_{S\alpha\sigma} + \gamma \cdot T_{S\alpha\sigma} \\
(6d) \quad P_{S\alpha\sigma}^{\dot{}} &= -(\mu_{S\alpha\sigma} + \mu^P) \cdot P_{S\alpha\sigma}
\end{aligned}$$

**Adult  $\varphi$** 

$$\begin{aligned}
(7a) \quad S_{A\varphi}^{\dot{}} &= -(\mu_{A\varphi} + f_1) \cdot S_{A\varphi} + \omega \cdot R_{A\varphi} \\
(7b) \quad T_{A\varphi}^{\dot{}} &= -(\mu_{A\varphi} + \mu^T + \gamma) \cdot T_{A\varphi} + f_1 \cdot S_{A\varphi} \\
(7c) \quad R_{A\varphi}^{\dot{}} &= -\mu_{A\varphi} \cdot R_{A\varphi}^g + \nu(t) \cdot \gamma \cdot T_{A\varphi} \\
(7d) \quad R_{A\varphi}^{\dot{}} &= -(\mu_{A\varphi} + \omega) \cdot R_{A\varphi} + (1 - \nu(t)) \cdot \gamma \cdot T_{A\varphi} \\
(7e) \quad P_{A\varphi}^{\dot{}} &= -(\mu_{A\varphi} + \mu^P) \cdot P_{A\varphi}
\end{aligned}$$

**Adult  $\sigma$** 

$$\begin{aligned}
(8a) \quad S_{A\sigma}^{\dot{}} &= -(\mu_{A\sigma} + f_3) \cdot S_{A\sigma} + \omega \cdot R_{A\sigma} \\
(8b) \quad T_{A\sigma}^{\dot{}} &= -(\mu_{A\sigma} + \mu^T + \gamma) \cdot T_{A\sigma} + f_3 \cdot S_{A\sigma} \\
(8c) \quad R_{A\sigma}^{\dot{}} &= -(\mu_{A\sigma} + \omega) \cdot R_{A\sigma} + \gamma \cdot T_{A\sigma} \\
(8d) \quad P_{A\sigma}^{\dot{}} &= -(\mu_{A\sigma} + \mu^P) \cdot P_{A\sigma}
\end{aligned}$$

$p_{X\varphi}$  is the proportion of females in the class  $X$  (sub-adults or adults) infected during the first half of gestation.  $T_{N,X\varphi}(t)$  is the number of new cases of transiently infected at time  $t$  in females who will be part of the class  $X$  (sub-adult or adult) at the time of mating.

$$(9) \quad p_{X\varphi}(t) = \frac{\sum_{k=t-170}^{k=t-86} T_{N,X\varphi}(k)}{\sum_{k=t-170}^{k=t-\frac{1}{\gamma}} T_{N,X\varphi}(k)}$$

Function of horizontal transmission designated by  $f_i$  depends on the sex and age of animals. Thus, according to the contact matrix above, it is considered three forces of infection :  $f_1$  for juvenile females and males, sub-adults females and adults females,  $f_2$  for sub-adult males and  $f_3$  for adults males.  $N$  is the total population,  $T$  and  $P$  denote the set of transiently infected and persistently infected. A frequency-dependent function is used because it is considered that the contact structure is heterogeneous.

$$(10a) \quad f_1 = \left( \beta_T \cdot \frac{T - \tau(t) \cdot T_{A\sigma}}{N - \tau(t) \cdot A_\sigma} + \beta_P \cdot \frac{P - \tau(t) \cdot P_{A\sigma}}{N - \tau(t) \cdot A_\sigma} \right)$$

$$(10b) \quad f_2 = \left( \beta_T \cdot \frac{T}{N} + \beta_P \cdot \frac{P}{N} \right)$$

$$(10c) \quad f_3 = \left( \beta_T \cdot \frac{T - \tau(t) \cdot (T_B + T_Y + T_{Sa\varphi} + T_{A\varphi})}{N - \tau(t) \cdot (B + Y + Sa_\varphi + A_\varphi)} + \beta_P \cdot \frac{P - \tau(t) \cdot (P_B + P_Y + P_{Sa\varphi} + P_{A\varphi})}{N - \tau(t) \cdot (B + Y + Sa_\varphi + A_\varphi)} \right)$$

## Density dependence

Sigmoid function use for density dependence on the mortality rate of juveniles and the fertility rate of females subadults. In the case of fertility rate, the considered population size is at birth, i.e. two years before.

$$\mu_{Juv}(t) = \mu_{Juv}^{min} + \frac{\mu_{Juv}^{max} - \mu_{Juv}^{min}}{1 + \exp(K \times d - d \times N(t))}$$

$$\eta_{Sa}(t) = \frac{\eta_{Sa}^{max}}{1 + \exp(d \times N(t - 2yrs) - K \times d)}$$

$$\eta_{SaP}(t) = \frac{\eta_{SaP}^{max}}{1 + \exp(d \times N(t - 2yrs) - K \times d)}$$
