# Supplementary material for: A novel epidemiological model to better understand and predict the observed seasonal spread of Pestivirus in Pyrenean chamois populations
Source: Springer Nature journal article supplement (doi:10.1186/s13567-015-0218-8), 2015-07-24
Supplement: MOESM4 [file 13567_2015_218_MOESM4_ESM.pdf]

## Additional file 4 - Data used for estimation by ABC

Numbers of animals by age classes and sex, available in the epidemiological survey for the last eleven years, during spring (Spr.) and autumn (Aut.) (J : juveniles, Sa : subadults, A : adults). Only animals tested for antibodies and viral antigen are take into account for the parameters estimation.

|       | 2000 |      | 2001 |      | 2002 |      | 2003 |      | 2004 |      | 2005 |      | 2006 |      | 2007 |      | 2008 |      | 2009 |      | 2010 |      |   |
|-------|------|------|------|------|------|------|------|------|------|------|------|------|------|------|------|------|------|------|------|------|------|------|---|
|       | Spr. | Aut. | Spr. | Aut. | Spr. | Aut. | Spr. | Aut. | Spr. | Aut. | Spr. | Aut. | Spr. | Aut. | Spr. | Aut. | Spr. | Aut. | Spr. | Aut. | Spr. | Aut. |   |
| J ♂   | 0    | 3    | 0    | 2    | 0    | 3    | 0    | 4    | 0    | 2    | 0    | 3    | 0    | 0    | 0    | 1    | 0    | 0    | 0    | 0    | 0    | 0    | 0 |
| J ♀   | 0    | 1    | 3    | 2    | 2    | 3    | 1    | 5    | 0    | 2    | 0    | 0    | 0    | 0    | 2    | 2    | 1    | 0    | 0    | 0    | 1    | 0    | 0 |
| Sa ♂  | 0    | 6    | 1    | 0    | 2    | 0    | 0    | 3    | 0    | 7    | 0    | 5    | 0    | 0    | 1    | 9    | 4    | 0    | 0    | 0    | 2    | 0    | 0 |
| Sa ♀  | 0    | 2    | 0    | 2    | 0    | 2    | 0    | 3    | 0    | 3    | 0    | 0    | 0    | 0    | 1    | 0    | 0    | 0    | 0    | 0    | 0    | 0    | 0 |
| A ♂   | 1    | 2    | 2    | 3    | 1    | 3    | 3    | 4    | 0    | 2    | 0    | 1    | 0    | 0    | 1    | 0    | 0    | 0    | 0    | 0    | 1    | 0    | 0 |
| A ♀   | 12   | 2    | 6    | 1    | 11   | 8    | 10   | 2    | 13   | 5    | 0    | 4    | 0    | 0    | 5    | 10   | 9    | 0    | 0    | 0    | 10   | 0    | 0 |
| Total | 13   | 16   | 12   | 10   | 16   | 19   | 14   | 21   | 13   | 21   | 0    | 13   | 0    | 0    | 9    | 23   | 14   | 0    | 0    | 0    | 14   | 0    | 0 |

Number of animals according to their serological status, aggregated by age classes and sampling seasons. Only data about “antibody +” and “antibody -” were used for the estimation.

|            | Juveniles |        | Subadults |        | Adults |        |
|------------|-----------|--------|-----------|--------|--------|--------|
|            | Spring    | Autumn | Spring    | Autumn | Spring | Autumn |
| antibody + | 0         | 3      | 2         | 12     | 71     | 45     |
| antibody - | 0         | 21     | 17        | 13     | 15     | 11     |
